# Supplementary material for: Calcium fluxes in dorsal forerunner cells antagonize β-catenin and alter left-right patterning
Source: Oxford University Press journal article supplement (doi:10.1242/dev.004713), 2007-11-29
Supplement: dev004713-tables1.pdf [file dev004713-tables1.pdf]

**Table S1. Heart jogging vs looping (%)**

|                      | Jogging   | <i>n</i> | D-loop | L-loop | No loop |
|----------------------|-----------|----------|--------|--------|---------|
| Wild type            | Left jog  | 160      | 99     | 0      | 1       |
|                      | Right jog | 2        | 0      | 50     | 50      |
|                      | No jog    | 8        | 12     | 50     | 38      |
| Control              | Left jog  | 190      | 99     | 0      | 1       |
|                      | Right jog | 8        | 25     | 50     | 25      |
|                      | No jog    | 10       | 50     | 20     | 30      |
| Thapsigargin-treated | Left jog  | 45       | 80     | 6      | 14      |
|                      | Right jog | 27       | 22     | 63     | 15      |
|                      | No jog    | 27       | 30     | 22     | 48      |
